# Supplementary material
Source: PubMed Central journal article supplement (PMC5514713)
Supplement: pnas.1700331114.sapp.pdf [file pnas.1700331114.sapp.pdf]

## Supplementary information

Fig. S1. Absence of G-protein coupling to  $\beta$ -arrestin biased  $M_1R$  (R123L  $M_1R$ ). (A) Schematic diagram of the arginine (R) to leucine (L) mutation in the third transmembrane domain (black circle). (B) FRET interaction between  $G_q$ -CFP and R123L  $M_1R$ -SNAP505 (red) compared to WT  $M_1R$ -SNAP505 (black).  $N = 5$ . (C)  $PI(4,5)P_2$  hydrolysis monitored with the  $PI(4,5)P_2$ -sensitive PH-RFP probe in confocal microscopy (see Materials and Methods). The y-axis for the normalized cytosolic intensity of PH-RFP probe is inverted to reflect  $PI(4,5)P_2$  depletion at the plasma membrane by WT  $M_1R$  (black symbols,  $N = 2$ ,  $n = 4$ ) or R123L  $M_1R$  (red symbols,  $N = 2$ ,  $n = 6$ ). Experiments for this figure used  $100 \mu M$  oxotremorine (Oxo).

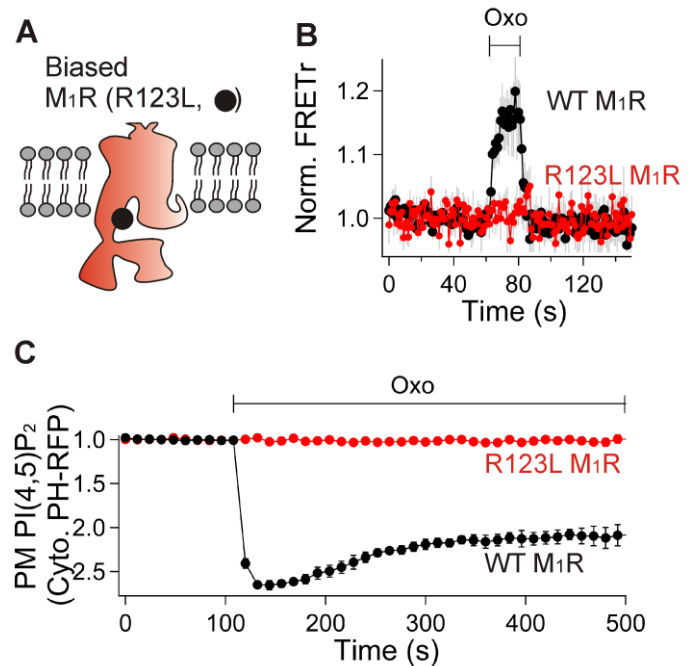

Fig. S2. Time-dependent formation of stable  $\beta$ -arrestin binding to  $M_1R$ . (A and B) Normalized intermolecular FRET between  $\beta$ -arrestin 2 CFP and SNAP505-labeled WT  $M_1R$  (A,  $N = 5$ ) or R123L  $M_1R$  (B,  $N = 3$ ). Oxotremorine (Oxo) was applied first for 20 s and then for 2 min in sequence to the same cells in individual experiments. Dashed line indicates the basal level of normalized FRET.

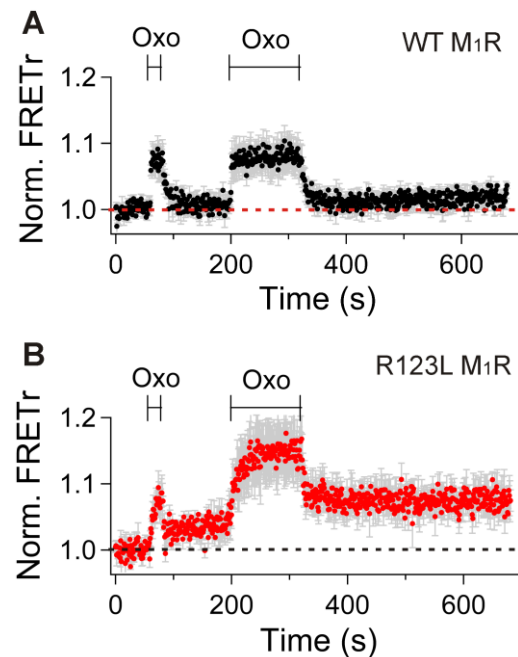

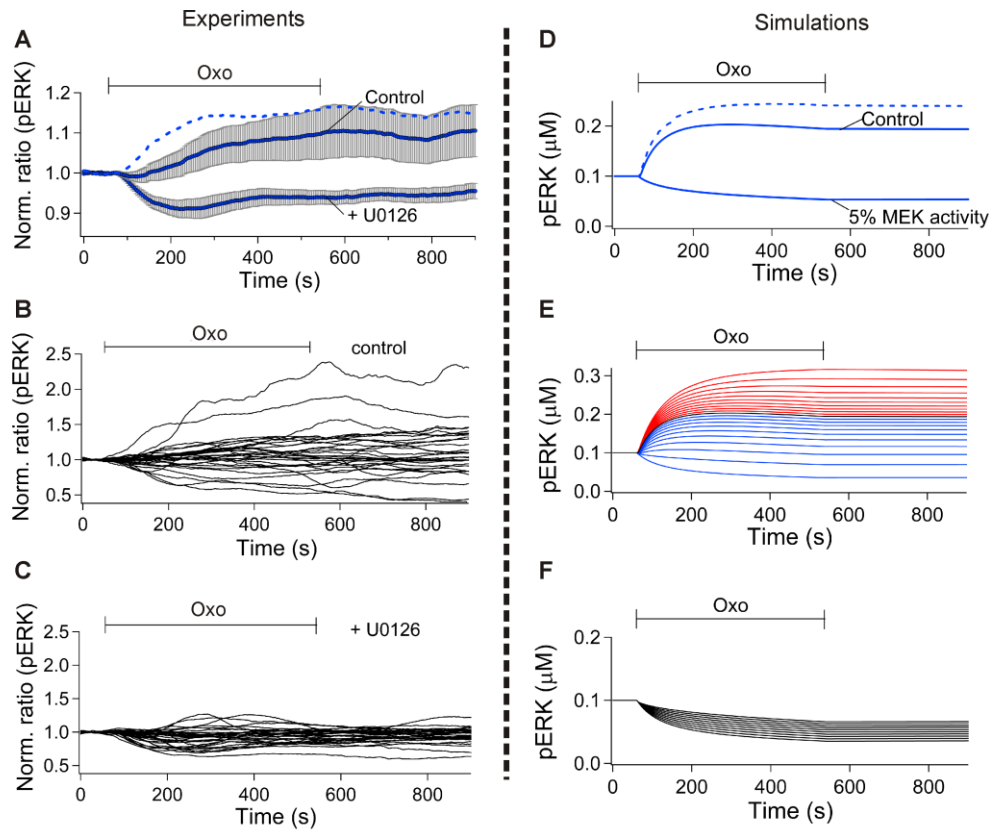

Fig. S3. ERK activation by the biased  $M_1R$  (R123L  $M_1R$ ). Activated ERK (pERK) was measured as the ERK KTR ratio ( $I_{cyt}/I_{nuc}$ ) and normalized to remove cell-to-cell variation (Norm. ratio). (A) Averaged time course of ERK KTR ratio after addition of oxotremorine (Oxo) without (Control) or with 3-min preincubation with 10  $\mu M$  U0126, a MEK1/2 inhibitor (+ U0126). The dashed line is Control minus U0126. (B, C) Raw data for (A). Each trace is from a single cell without (B,  $N = 4$ ,  $n = 34$ ) or with (C,  $N = 4$ ,  $n = 33$ ) the inhibitor. (D-F) Simulation of ERK phosphorylation with our mathematical model (See Fig. 4D). (D) Simulated ERK phosphorylation with 100% (Control) or 5% of MEK activity. The 5% trace simulates block by the inhibitor. The dashed line shows Control minus the 5% MEK effect. (E) Simulation of cell-to-cell variability in rates. Individual lines represent single simulations with a progressive variation of the rate constants for MEK or protein phosphatase (Reactions 10 and 13 in Fig. 4D). For the blue lines, MEK activity was reduced stepwise by 10%. For the red lines, the phosphatase activity was reduced stepwise by 10%. The black line in the middle represents 100% activity for each and is identical to Control in D. (F) Simulations obtained by varying the rate constant for MEK (0 to 9% of maximum rate constant) at a fixed rate constant for protein phosphatase (100%). 100  $\mu M$  Oxo was used for all experiments and simulations.

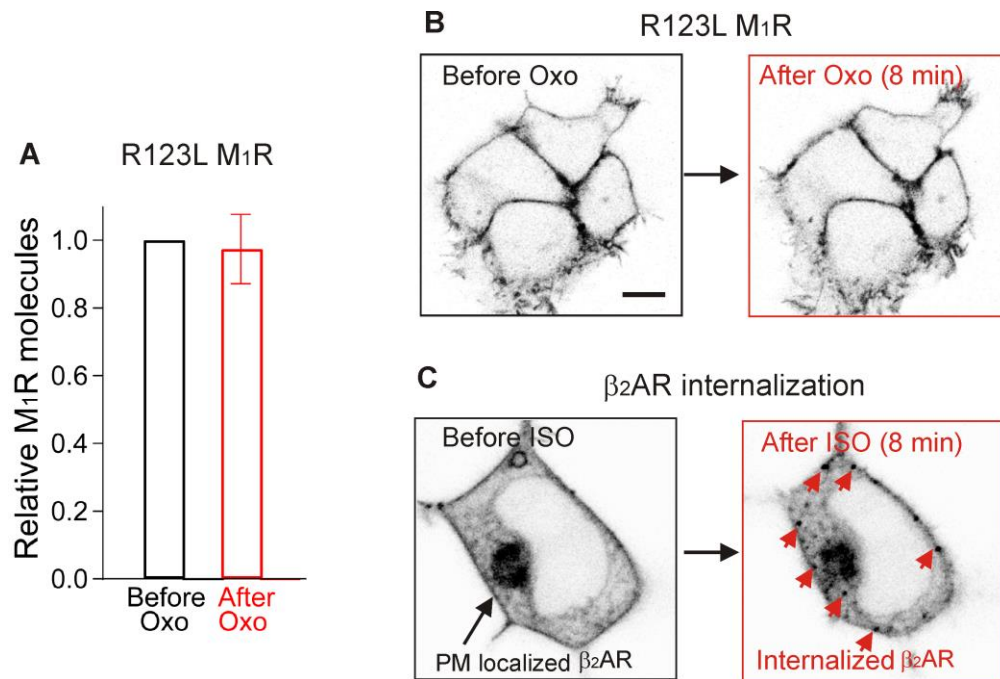

Fig. S4. Lack of internalization of activated R123L M<sub>1</sub>R (biased M<sub>1</sub>R). (A) Relative number of M<sub>1</sub>R molecules at or near the plasma membrane before and after 8 min in 100  $\mu$ M Oxo measured by single-molecule TIRF microscopy. N = 4. (B) Confocal images of R123L M<sub>1</sub>R-SNAP647 before and after 8 min in 100  $\mu$ M Oxo. (C) Confocal images for CFP tagged  $\beta_2$ -AR ( $\beta_2$ -adrenergic receptor) before and after 10  $\mu$ M isoproterenol (ISO), a  $\beta_2$ -AR agonist. In contrast to M<sub>1</sub>R, internalized  $\beta_2$ -ARs are visible in intracellular vesicles (arrow heads). Confocal images are inverted so that fluorescence signals appear black.

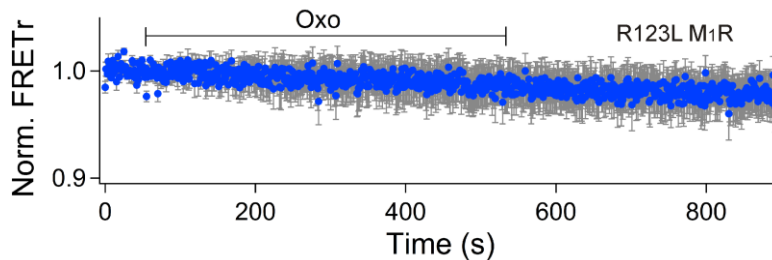

Fig. S5. No receptor-induced conformational change of  $\beta$ -arrestin when complexed with R123L M<sub>1</sub>R. Intramolecular FRET was measured using FLaSH-tagged  $\beta$ -arrestin 2 CFP during application of 100  $\mu$ M oxotremorine (Oxo). N = 9.

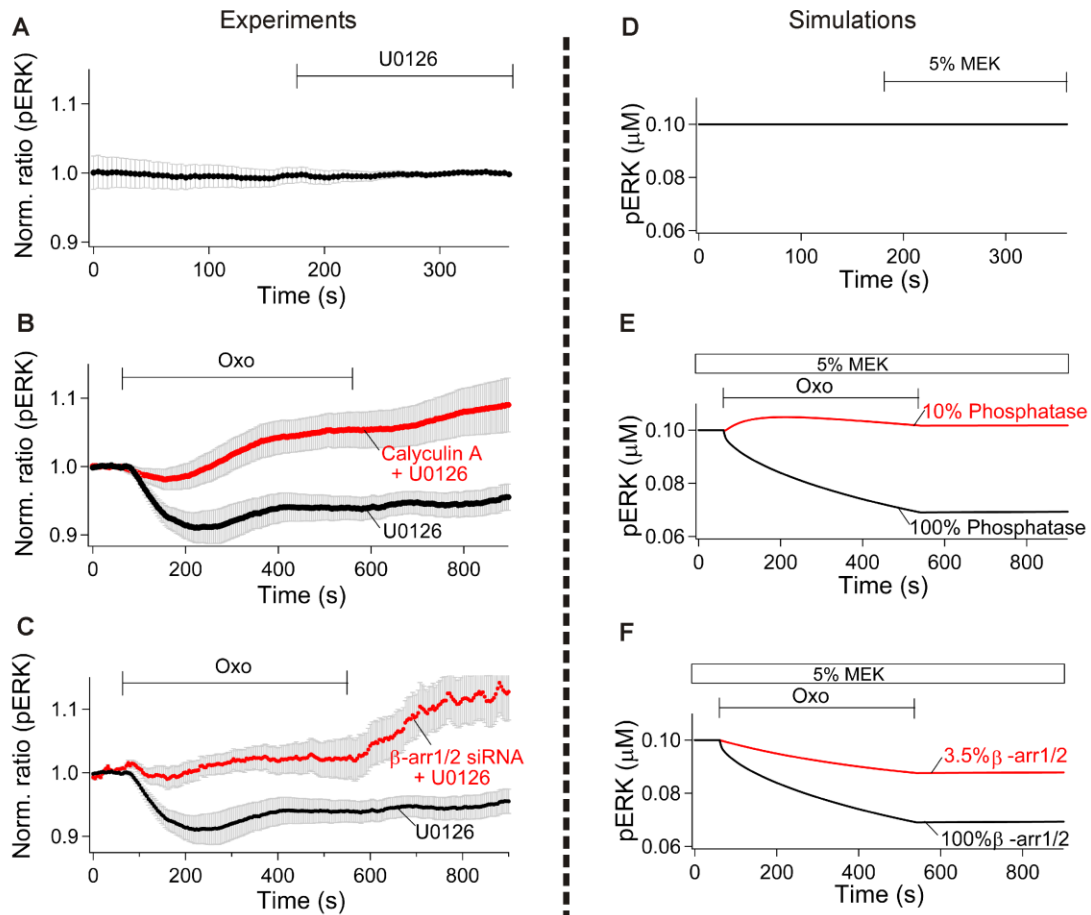

Fig. S6. Negative control of pERK by the biased  $M_1R$  involves  $\beta$ -arrestin and serine/threonine protein phosphatases. Plots show time course of the pERK KTR signal as a measure of activated ERK. (A) The MEK1/2 inhibitor (U0126) did not change the basal ERK activity signal, suggesting no basal activity of MEK1/2 ( $N = 4$ ,  $n = 33$ ). (B) After a 3-min pretreatment with the MEK inhibitor alone, the  $M_1R$  agonist (Oxo, 100  $\mu\text{M}$ ) reduced ERK activity (black,  $N = 4$  and  $n = 33$ ). Pretreatment with the PP1 and PP2A protein phosphatase inhibitor calyculin A (20 nM), antagonized the negative effect (red,  $N = 4$ ,  $n = 28$ ). The protein phosphatase inhibitor did not have any effect on the basal ERK KTR ratio, suggesting no basal activity of the protein phosphatases. (C) Knockdown of  $\beta$ -arrestin 1 and 2 using siRNA (red,  $N = 4$ ,  $n = 31$ ) had a similar effect on ERK activity as calyculin A. (D-F) Simulation of the effect of calyculin A and  $\beta$ -arrestin 1/2 knock-down on pERK. (D) The MEK inhibitor did not affect the basal pERK. For the simulation, MEK activity was reduced to 5% by the MEK inhibitor ('5% MEK', Reaction 10 in Fig. 4D). (E) To simulate the effect of calyculin A, the protein phosphatase was reduced to 10% by adjusting the rate constant of Reaction 13 in Fig. 4D. (F) For knock-down of  $\beta$ -arrestin 1/2 using siRNA, 96.5% of arrestin was assumed to be removed ('3.5%  $\beta$ -arr1/2'). 100  $\mu\text{M}$  Oxo was used in all experiments and simulations.

Fig. S7. Stabilization of  $\beta$ -arrestin and ERK activity with WT  $M_1R$  was regulated by CK2 but not by GRK2/3 protein kinases. (A) Intermolecular FRET measured between  $\beta$ -arrestin 2 and WT  $M_1R$ . Oxotremorine (Oxo) was applied for 20 s in the first pulse and then washed off. The same cells were treated with Oxo for 8 min. The red symbols indicate cells pretreated with 30  $\mu$ M cmpd101 for 3 min and the blocker was present during the whole experiment (N = 5). The gray symbols are obtained from the control cells without the GRK2/3 blocker (from Fig. 2B). Error bars are omitted for clarity. (B and C) A selective inhibitor of CK2, TBB (10  $\mu$ M), significantly blocked the persistent level of intermolecular FRET (B, N = 6) and ERK activity (C, N = 4, n = 29, P = 0.03 (\*)) with WT- $M_1R$ . The cells were pretreated with the inhibitor for at least 3 min before addition of Oxo and then Oxo was added for additional 8 min in the presence of the blocker. The control trace for ERK activity was obtained from Fig. 3H. 100  $\mu$ M Oxo was used for all experiments.

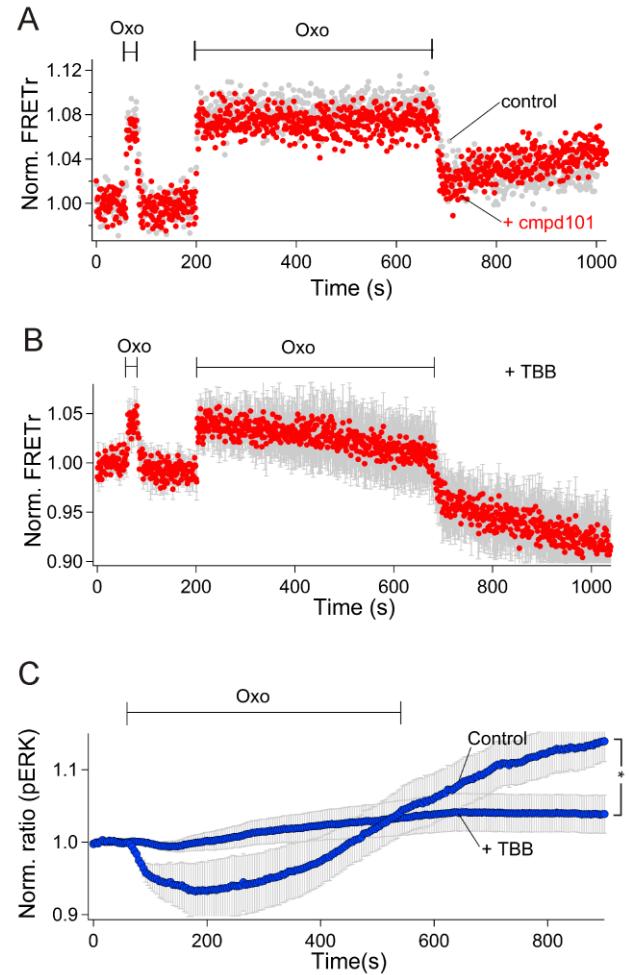

Fig. S8. Formation of stable  $\beta$ -arrestin-receptor complexes and activation of ERK by different mutants of R123L  $M_1R$  (biased  $M_1R$ ). The percentage of stabilized  $\beta$ -arrestin measured with intermolecular FRET (A) and ERK activity (B) after washing off  $M_1R$  agonist. After application of oxotremorine (Oxo) for 8 min, we estimated sustained levels during the following 6 min without the agonist. Light gray, red, dark gray bars indicate control, alanine mutant at two serine sites (S228A and S273A) in the third intracellular loop (ICL3 mutant), and alanine mutant at S451 and S457 in the C-tail of C-terminus (C-tail mutant), respectively. (A) Control (N = 9), ICL mutant (N = 4), and C-tail mutant (N = 5). (B) Control (N = 4, n = 34), ICL3 mutant (N = 4, n = 52), and C-tail mutant (N = 4, n = 52). The parameters were not significantly different between control and C-tail mutant. 100  $\mu$ M Oxo was used for these experiments.

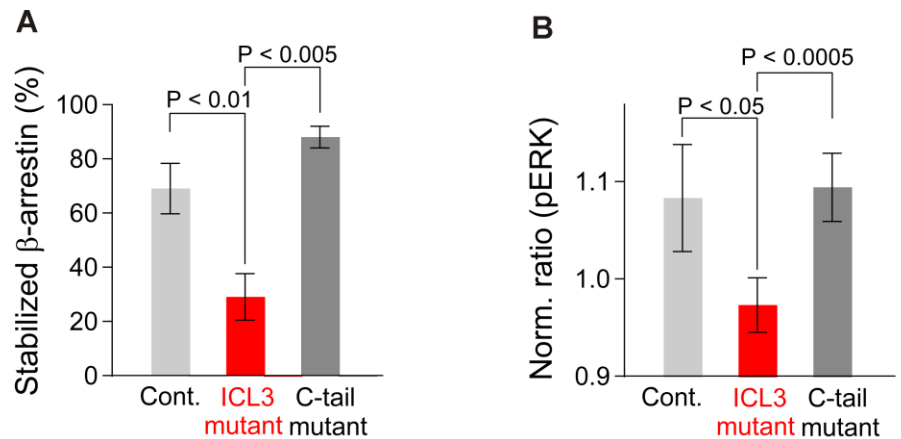

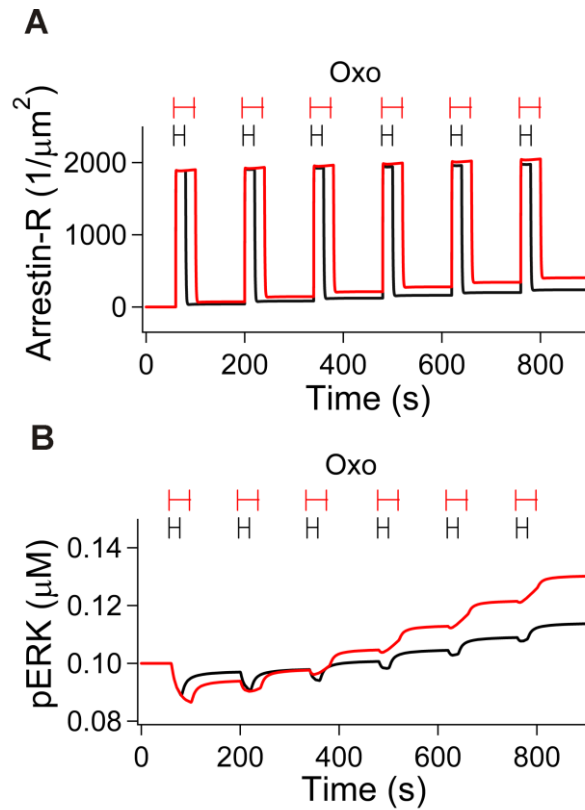

Fig. S9. Simulation of gradual rise of stably bound arrestin during repetitive stimulations of WT M<sub>1</sub>R. Total number of arrestin-bound receptor (A) and ERK phosphorylation (B) in repetitive applications of agonist (Oxo) in 20 s (black) and 40 s (red) duration. 100  $\mu\text{M}$  Oxo was used for these simulations.

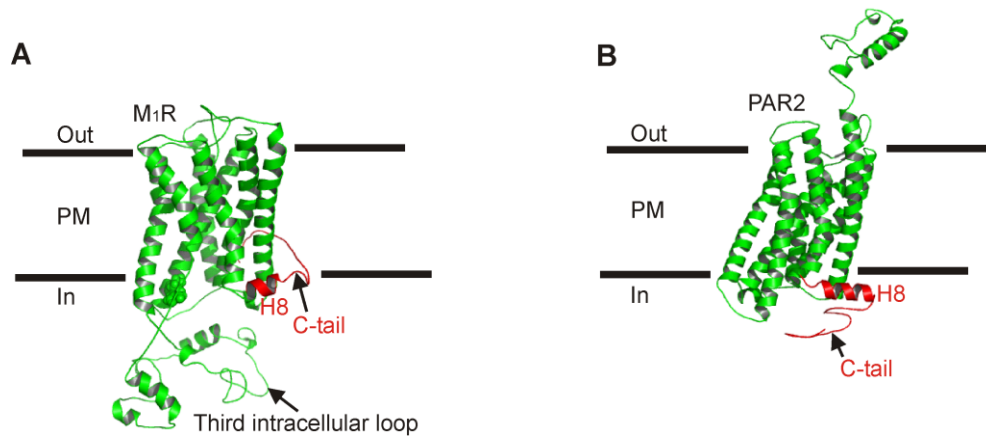

Fig. S10. Simulation of mouse M<sub>1</sub>R and human PAR2 structures. The whole structures of M<sub>1</sub>R (A) and PAR2 (B) were simulated with I-TASSER. The C-tail of each receptor is highlighted in red. The C-tail of M<sub>1</sub>R extending from helix 8 (H8) was not well positioned to the cytosolic interface to interact with arrestin partly because of occlusion by the extensive intracellular loop, while that of PAR2 is well exposed for arrestin binding. See Materials and Methods for detailed description about this simulation.

Table S1

*Model initial conditions and parameters*

| Species/rate constants   | Value                                                                                                                | Rationale                                                                                                                                                                                                                                                            |
|--------------------------|----------------------------------------------------------------------------------------------------------------------|----------------------------------------------------------------------------------------------------------------------------------------------------------------------------------------------------------------------------------------------------------------------|
| R (Receptor)             | 3,500 $\mu\text{m}^{-2}$                                                                                             | Receptor density at the plasma membrane (reference 1, Jung et al., 2016)                                                                                                                                                                                             |
| $\beta$ -arrestin        | 15 $\mu\text{M}$                                                                                                     | Cytosolic concentration of arrestins. We did not distinguish between $\beta$ -arrestin 1 and 2 (reference 1, Jung et al., 2016).                                                                                                                                     |
| GRK                      | 1000 molecules $\cdot\mu\text{m}^{-2}$<br>(if it is completely dissolved in cytosol, it would be 0.5 $\mu\text{M}$ ) | Membrane localized GRK pool for biased $\text{M}_1\text{R}$ . For WT $\text{M}_1\text{R}$ , we assumed that the GRK pool was only 1% left because of depletion of PI(4)P and PI(4,5)P <sub>2</sub> .                                                                 |
| CK2                      | 5 $\mu\text{M}$                                                                                                      | Cytosolic concentration of CK2 for WT $\text{M}_1\text{R}$ modeling. No CK2 action in the biased receptor model.                                                                                                                                                     |
| MEK                      | 1 $\mu\text{M}$                                                                                                      | Cytosolic MEK concentration (reference 2, Fujioka et al., 2006). To reduce unknown free parameters, we did not add the step for phosphorylation of MEK by the c-Raf. If MEK binds to the arrestin-GPCR complex, it can phosphorylate the ERK at the plasma membrane. |
| ERK                      | 1 $\mu\text{M}$                                                                                                      | Cytosolic ERK concentration (reference 2, Fujioka et al., 2006).                                                                                                                                                                                                     |
| pERK                     | 100 nM                                                                                                               | Basal level of phosphorylated ERK concentration. We assumed that 10% of total ERK was phosphorylated before $\text{M}_1\text{R}$ activation.                                                                                                                         |
| PM                       | 886 $\mu\text{m}^2$                                                                                                  | Total area of the plasma membrane                                                                                                                                                                                                                                    |
| Cytosol                  | 2,500 $\mu\text{m}^3$                                                                                                | Total volume of the cytosol                                                                                                                                                                                                                                          |
| EC                       | 250,000 $\mu\text{m}^3$                                                                                              | Extracellular volume for simulation                                                                                                                                                                                                                                  |
| Protein phosphatase (PP) | 5 $\mu\text{M}$                                                                                                      | Fitted to our pERK data.                                                                                                                                                                                                                                             |
| $k_{1,f}$                | 20 $\text{s}^{-1}\cdot\mu\text{M}^{-1}$                                                                              | Binding rate constant of ligand to R                                                                                                                                                                                                                                 |
| $k_{1,r}$                | 4 $\text{s}^{-1}$                                                                                                    | Dissociation rate constant of ligand from R to match for $K_d$ of Oxo ( $\sim 0.2 \mu\text{M}$ )                                                                                                                                                                     |
| $k_{2,f}$                | 0.28 $\text{s}^{-1}\cdot\mu\text{M}^{-1}$                                                                            | Rate constant for binding of $\beta$ -arrestin to RL (ligand-bound R)                                                                                                                                                                                                |
| $K_{2,r}$                | 2.4 $\text{s}^{-1}$                                                                                                  | Rate constant for dissociation of $\beta$ -arrestin to RL                                                                                                                                                                                                            |
| $K_{3,f}$                | 4 $\mu\text{m}^2\cdot\text{s}^{-1}\cdot\text{molecules}^{-1}$<br>(0.00005 $\text{s}^{-1}\cdot\mu\text{M}^{-1}$ )     | Rate constant for binding of GRK<br>(Rate constant for binding of CK2)                                                                                                                                                                                               |
| $k_{3,r}$                | 4 $\text{s}^{-1}$<br>(1 $\text{s}^{-1}$ )                                                                            | Rate constant for dissociation of GRK<br>(Rate constant for dissociation of CK2)                                                                                                                                                                                     |
| $k_{4,f}$                | 0.9 $\text{s}^{-1}$<br>(0.01 $\text{s}^{-1}$ )                                                                       | Rate constant for phosphorylation at both of S228 and S273 of RL by GRK (or CK2)                                                                                                                                                                                     |

|            |                                                                                                                       |                                                                                                                                                            |
|------------|-----------------------------------------------------------------------------------------------------------------------|------------------------------------------------------------------------------------------------------------------------------------------------------------|
| $K_{5,f}$  | $2 \text{ s}^{-1}$<br>( $10 \text{ s}^{-1}$ )                                                                         | Rate constant for dissociation of GRK after phosphorylation<br>(Rate constant for dissociation of CK2 after phosphorylation)                               |
| $k_{5,r}$  | $100 \mu\text{m}^2 \cdot \text{s}^{-1} \cdot \text{molecules}^{-1}$<br>( $10 \text{ s}^{-1} \cdot \mu\text{M}^{-1}$ ) | Rate constant for rebinding of GRK (or CK2) to phosphorylated receptor (RLpp)                                                                              |
| $k_6$      | $0.5 \text{ s}^{-1}$                                                                                                  | Rate constant for dephosphorylation of phosphorylated receptor (RLpp) by nonspecific protein phosphatase                                                   |
| $k_{7,f}$  | $1 \text{ s}^{-1} \cdot \mu\text{M}^{-1}$                                                                             | Rate constant for $\beta$ -arrestin binding to phosphorylated $M_1R$ at both of S228 and S273                                                              |
| $k_{7,r}$  | $10 \text{ s}^{-1}$                                                                                                   | Rate constant for $\beta$ -arrestin dissociation from phosphorylated $M_1R$ at both of S228 and S273 (RLpp)                                                |
| $k_{8,f}$  | $0.1 \text{ s}^{-1} \cdot \mu\text{M}^{-1}$                                                                           | Rate constant for MEK binding to RLppA                                                                                                                     |
| $k_{8,r}$  | $0.00005 \text{ s}^{-1}$                                                                                              | Rate constant for MEK dissociation from RLppAM                                                                                                             |
| $k_{9,f}$  | $0.5 \text{ s}^{-1} \cdot \mu\text{M}^{-1}$                                                                           | Rate constant for ERK binding to RLppAM                                                                                                                    |
| $k_{9,r}$  | $2.5 \text{ s}^{-1}$                                                                                                  | Rate constant for ERK dissociation from RLppAME                                                                                                            |
| $k_{10,f}$ | $3 \text{ s}^{-1}$<br>( $9 \text{ s}^{-1}$ )                                                                          | Rate constant for phosphorylation of ERK (RLppAME) by MEK in biased receptor (or WT $M_1R$ )                                                               |
| $k_{10,r}$ | $0.03 \text{ s}^{-1}$<br>( $0.36 \text{ s}^{-1}$ )                                                                    | Rate constant for dephosphorylation of pERK (RLppAMpE) by nonspecific protein phosphatases to make steady-state of pERK in biased receptor (or WT $M_1R$ ) |
| $k_{11}$   | $2 \text{ s}^{-1}$                                                                                                    | Rate constant for dissociation of pERK from RLppAMpE                                                                                                       |
| $k_{12,f}$ | $0.0001 \text{ s}^{-1} \cdot \mu\text{M}^{-1}$<br>( $0.00003 \text{ s}^{-1} \cdot \mu\text{M}^{-1}$ )                 | Rate constant for binding of protein phosphatase (PP) to RLA in biased receptor (or WT $M_1R$ )                                                            |
| $k_{12,r}$ | $0.00006 \text{ s}^{-1}$                                                                                              | Rate constant for dissociation of protein phosphatase (PP) from RLAPP                                                                                      |
| $k_{13}$   | $24 \text{ s}^{-1} \cdot \mu\text{M}^{-1}$<br>( $90 \text{ s}^{-1} \cdot \mu\text{M}^{-1}$ )                          | Rate constant for dephosphorylation of pERK by RLAPP in biased receptor (or WT $M_1R$ )                                                                    |

---

## Reference

- 1 Jung SR, et al (2016) Contributions of protein kinases and  $\beta$ -arrestin to termination of protease-activated receptor 2 signaling. *J Gen Physiol* 147:255-271.
- 2 Fujioka A, et al (2006) Dynamics of the Ras/ERK MAPK cascade as monitored by fluorescent probes. *J Biol Chem* 281:8917-8926.
